# Supplementary material for: Genome-Wide Analysis of Natural Selection on Human Cis-Elements
Source: PLoS One. 2008 Sep 10;3(9):e3137. doi: 10.1371/journal.pone.0003137 (PMC2522239; doi:10.1371/journal.pone.0003137)
Supplement: Supplementary File S3 — Provides the chromosome clustering analysis of high DAF SNPs. (14.09 MB XLS) [file pone.0003137.s003.xls]

## Sheet: CHR 11
CHR 11		BLUE: Foreground	226871	0.822				PINK: Background	616220	0.983
			280233	0.678					626399	0.18
			1830648	0.228					2876859	0.628
			2377970	0.483					2877242	0.573
			3035461	0.178					4522066	0.617
			3206924	0.613					4522953	0.333
			4071638	0.078					4621233	0.59
			4676154	0.193					4869323	0.4
			4827075	0.006					5495354	0.056
			5430465	0.196					6898315	0.466
			5488161	0.067					7228939	0.028
			6212390	0.983					7684694	0.481
			6236824	0.826					10519512	0.017
			6298324	0.441					10630620	0.017
			6298594	0.103					15051706	0.805
			6298734	0.902					18084255	0.833
			6298905	0.09					18300398	0.03
			6419664	0.072					18612847	0.42
			7015461	0.157					26702484	0.133
			7651977	0.978					27019551	0.05
			8016700	0.994					30300501	0.113
			8817620	0.522					34894845	0.096
			8921267	0.124					34895416	0.096
			9070714	0.994					44025766	0.033
			10519632	0.017					47227351	0.107
			13441449	0.196					57947323	0.837
			13939875	0.978					57947779	0.125
			15126340	0.972					58668028	0.298
			17697354	0.039					60222990	0.202
			18566941	0.011					60626188	0.011
			19094523	0.5					61316657	0.326
			26551215	0.247					62540348	0.276
			26701719	0.033					63815398	0.079
			30300333	0.017					65236166	0.006
			30301167	0.017					65792555	0.341
			31347404	0.017					67554281	0.594
			31796841	0.273					69921951	0.011
			33139649	0.169					72063373	0.416
			33871039	0.647					72182496	0.398
			34492200	0.174					73266218	0.669
			34893906	0.091					74376841	0.201
			34893992	0.09					77452247	0.348
			35397552	0.284					86061327	0.483
			43290052	0.433					88864366	0.494
			45896217	0.051					93114439	0.904
			46678797	0.404					95466766	0.722
			47226831	0.295					102468042	0.182
			47746352	0.697					107843550	0.006
			58102262	0.006					111542863	0.142
			59278963	0.949					112763275	0.449
			59952735	0.202					113083230	0.331
			60223056	0.045					113280105	0.884
			60309278	0.017					113776417	0.144
			60819732	0.978					114037710	0.117
			61473681	0.14					114037891	0.35
			61473913	0.949					116474649	0.894
			61647870	0.92					118259728	0.898
			61861409	0.375					118443525	0.169
			62379790	0.882					118722665	0.756
			62508865	0.275					118722766	0.753
			63627386	0.547					123816610	0.994
			63750806	0.079					124328515	0.034
			63753905	0.022					125000731	0.185
			64645531	0.022					125644310	0.006
			64704853	0.716					133627671	0.302
			65139140	0.097
			65403836	0.444
			66117160	0.1
			66826593	0.169
			66898059	0.822
			67032811	0.09
			67033045	0.165
			68427288	0.455
			68427995	0.028
			69601186	0.033
			70841068	0.444
			71387372	0.079
			71579893	0.911
			72653119	0.956
			73372402	0.439
			74120579	0.589
			74539064	0.354
			74741514	0.006
			76863127	0.236
			76978193	0.236
			78459046	0.584
			82582359	0.011
			85017190	0.551
			86061642	0.545
			87711304	0.528
			92571724	0.022
			93114326	0.904
			93916309	0.719
			95163081	0.528
			104986423	0.039
			110755860	0.528
			111254559	0.006
			111601847	0.787
			112577815	0.383
			112851561	0.871
			113083110	0.039
			117305479	0.217
			117306056	0.006
			117452418	0.59
			117452643	0.061
			117628698	0.239
			117640955	0.708
			117735433	0.439
			118055811	0.551
			118287684	0.916
			118393829	0.904
			118460719	0.117
			118524730	0.144
			118800273	0.91
			119615429	0.244
			122214388	0.27
			122901074	0.465
			123031085	0.095
			123314965	0.122
			123800592	0.208
			124311670	0.178
			124329151	0.253
			124329191	0.157
			125585967	0.006
			125586613	0.815
			130745014	0.017
			133221072	0.041

## Sheet: CHR 1
		BLUE: Foreground	1500967	0.871		PINK: Background	3703893	0.029
			1701558	0.006			3762949	0.831
			1812749	0.989			6503144	0.011
			1970978	0.292			6503187	0.024
			2927172	0.172			9052532	0.035
			2927410	0.307			9053237	0.736
			3556566	0.815			9807877	0.86
			8927907	0.861			15725326	0.354
			9925816	0.225			15882443	0.382
			10946940	0.534			16219511	0.628
			10946982	0.455			16355563	0.096
			11788391	0.864			17570941	0.006
			15725291	0.354			20123317	0.876
			16219044	0.261			20337478	0.68
			16219094	0.689			20787759	0.173
			16552434	0.833			22011054	0.281
			16637290	0.287			24614406	0.292
			17447742	0.506			27583247	0.73
			18829257	0.882			31003920	0.606
			20014507	0.39			31542001	0.14
			20015000	0.315			31654059	0.64
			20015057	0.174			31814425	0.253
			20081412	0.045			32934199	0.112
			20384395	0.612			33710543	0.017
			20686075	0.629			36321744	0.483
			20788005	0.208			36722023	0.19
			23730589	0.034			37711760	0.185
			23730904	0.994			40192793	0.506
			26389432	0.253			41217190	0.386
			26432953	0.112			42403311	0.483
			26516666	0.292			42771912	0.815
			26516801	0.541			43523896	0.16
			26631335	0.072			43628497	0.899
			28435127	0.122			43693273	0.596
			29085921	0.14			45225752	0.727
			33507948	0.792			45729877	0.933
			36393773	0.112			47036720	0.744
			36722210	0.08			48710536	0.006
			37273310	0.511			52294944	0.91
			40278148	0.247			54437509	0.584
			40278258	0.756			54889588	0.167
			40496205	0.109			55125958	0.022
			40746743	0.916			61964047	0.04
			42391327	0.081			64011312	0.144
			43628133	0.902			67669260	0.261
			45579651	0.017			76170837	0.572
			45729626	0.539			77458271	0.817
			45862388	0.624			87152225	0.017
			46412553	0.012			87153219	0.014
			47261588	0.144			92537690	0.977
			47429728	0.194			93317217	0.933
			53458971	0.064			95311503	0.146
			53973250	0.006			100087557	0.096
			54128694	0.258			100488336	0.09
			54128949	0.167			100488379	0.09
			54434934	0.216			101134959	0.1
			54862049	0.629			109308187	0.406
			54862296	0.371			110085308	0.81
			55002900	0.135			110794872	0.034
			60052128	0.05			111690179	0.318
			68072385	0.399			112740020	0.551
			76034583	0.163			112965052	0.8
			76035111	0.012			114249088	0.128
			84237624	0.628			115985165	0.039
			84238133	0.725			119712012	0.15
			85947402	0.466			145712657	0.372
			87152584	0.94			148746997	0.646
			89231261	0.006			149779050	0.065
			91260676	0.011			150071673	0.157
			92406353	0.006			151588876	0.037
			99243315	0.674			152458767	0.955
			100503851	0.089			153201877	0.989
			100775421	0.09			153924709	0.259
			110108786	0.994			154518761	0.778
			110108963	0.895			154827185	0.034
			110863572	0.194			156990966	0.118
			115373439	0.567			157951760	0.117
			148787650	0.118			158190881	0.122
			149220885	0.163			158306901	0.006
			150149450	0.612			159099485	0.644
			151456561	0.079			159389527	0.528
			151550602	0.567			159395864	0.142
			151588208	0.888			159461024	0.477
			152162836	0.242			159547087	0.09
			152186380	0.242			165224427	0.242
			152867781	0.478			165329038	0.792
			153176636	0.112			167722670	0.122
			154170884	0.006			168031192	0.326
			154177454	0.086			170017094	0.367
			154297444	0.107			172154066	0.292
			154430342	0.118			173979809	0.696
			154827348	0.966			176748510	0.025
			154837959	0.92			178114342	0.133
			155139391	0.225			178738993	0.388
			156229597	0.933			181421928	0.289
			157823462	0.826			199745448	0.128
			158162603	0.472			200242824	0.483
			159100150	0.36			200946468	0.622
			159402183	0.101			203358273	0.972
			159435789	0.331			203986155	0.416
			159461772	0.522			205162246	0.289
			159986003	0.011			205273387	0.006
			160001742	0.36			207995922	0.826
			160002659	0.094			208568127	0.556
			161305237	0.47			211098031	0.039
			163866603	0.211			226661911	0.017
			165755423	0.156			226711550	0.006
			165790011	0.006			228917281	0.85
			167602964	0.136			228917563	0.854
			167947981	0.258			228949479	0.561
			168031676	0.344			229444384	0.618
			169888598	0.606			229730826	0.416
			170017180	0.494
			173979829	0.261
			173980361	0.22
			175406435	0.163
			177601424	0.539
			177812292	0.371
			177826777	0.689
			178867222	0.472
			179269371	0.557
			183210460	0.966
			185064102	0.152
			198857475	0.267
			198906306	0.646
			199613938	0.022
			199858256	0.062
			200397377	0.096
			201261256	0.713
			201411843	0.083
			201861769	0.376
			203063509	0.062
			203064083	0.208
			203739456	0.547
			203986480	0.185
			204086277	0.398
			204180149	0.011
			204875315	0.144
			204924030	0.264
			205013257	0.715
			205038695	0.709
			205186476	0.118
			216524681	0.64
			218987480	0.438
			222584530	0.917
			222584697	0.917
			222869748	0.079
			222870498	0.083
			224063577	0.68
			224254522	0.322
			225573571	0.594
			226741141	0.399
			228949569	0.556
			229072127	0.478
			230764147	0.427
			230764423	0.41
			245647191	0.128

## Sheet: CHR 5
		BLUE: Foreground	243958	0.247		PINK: Background	243784	0.012
			10293409	0.989			10292737	0.074
			14634556	0.967			33476063	0.144
			31567931	0.034			33476567	0.717
			36188499	0.59			36278111	0.721
			36641642	0.117			39255812	0.5
			39400881	0.287			40876744	0.033
			39460989	0.039			41297825	0.006
			41960706	0.978			53786607	0.361
			43551037	0.1			60031841	0.124
			44843836	0.534			64894443	0.32
			53642897	0.283			64955633	0.622
			53643018	0.678			65475720	0.409
			54317472	0.333			70918409	0.407
			54565387	0.773			70918706	0.092
			60031858	0.197			71438659	0.112
			60276899	0.92			72896819	0.011
			64021456	0.011			72897122	0.867
			64894336	0.194			74667889	0.044
			64894783	0.32			76283540	0.156
			65052908	0.739			79739299	0.949
			66528463	0.806			82408502	0.276
			66528481	0.122			94916388	0.522
			68521122	0.506			100267086	0.331
			74015953	0.218			108774012	0.035
			74016555	0.513			110433574	0.717
			74844173	0.15			115326131	0.298
			75049112	0.051			115448314	0.444
			75463274	0.247			118992301	0.494
			77691868	0.466			122787761	0.324
			78789572	0.135			128327813	0.078
			79651305	0.089			132036543	0.033
			79985201	0.972			132037053	0.753
			89861407	0.207			132415159	0.579
			98132877	0.006			133477726	0.865
			110102576	0.972			134943008	0.619
			110455246	0.656			135197452	0.033
			111783307	0.983			138747557	0.612
			112100788	0.006			139991652	0.022
			115180593	0.421			141319164	0.617
			115447867	0.449			146870266	0.039
			118992633	0.039			147191586	0.122
			118992866	0.5			149473205	0.747
			122452431	0.972			149473251	0.25
			126653447	0.528			149549517	0.489
			134763757	0.039			150708073	0.35
			135197807	0.966			150807302	0.05
			137701066	0.124			151047605	0.789
			139991499	0.146			153805358	0.067
			139991533	0.012			156705552	0.011
			140059235	0.475			157090950	0.578
			140551710	0.624			157091017	0.219
			142046418	0.144			159699532	0.433
			143530410	0.95			160211860	0.978
			147142758	0.054			166643564	0.091
			148184770	0.344			167888798	0.092
			149360090	0.118			170142746	0.247
			149867926	0.815			170142815	0.006
			150441262	0.5			170142820	0.247
			150663656	0.573			172193023	0.694
			151284953	0.393			174851386	0.339
			156469454	0.983			176382212	0.989
			157090992	0.207			177592725	0.535
			157219233	0.123			178300702	0.189
			160908500	0.063			178705647	0.511
			169657817	0.309			178705809	0.506
			169713335	0.253
			170143068	0.006
			172415629	0.8
			173348013	0.061
			175897089	0.284
			180514367	0.888
			180565235	0.118

## Sheet: CHR 6
CHR 6		BLUE: Foreground	4949527	0.152		PINK: Background	2710135	0.938
			4949886	0.185			4949595	0.81
			7535179	0.167			7258480	0.079
			8380882	0.36			7334944	0.472
			10528467	0.753			7535368	0.067
			10802794	0.983			7671056	0.406
			10994935	0.4			8048002	0.422
			10995262	0.404			11490700	0.022
			11153178	0.101			20321184	0.273
			11153182	0.101			24234264	0.121
			11915660	0.006			25862250	0.112
			14032547	0.989			25990621	0.09
			16345822	0.67			28664030	0.149
			20321313	0.921			29382327	0.283
			20509888	0.011			29382335	0.693
			24775641	0.09			30211550	0.764
			25991085	0.792			30211877	0.222
			26128410	0.73			30702373	0.815
			28475662	0.744			31188878	0.669
			29381591	0.933			31233756	0.073
			29778422	0.232			31234923	0.534
			30136531	0.011			31651010	0.028
			30136873	0.011			31695540	0.382
			30141669	0.063			31853497	0.084
			30151758	0.201			32047350	0.006
			30188973	0.23			32300538	0.045
			30189087	0.67			32921257	0.152
			30237655	0.131			33044216	0.472
			30289813	0.298			33044240	0.011
			31188898	0.689			33085513	0.564
			31196901	0.253			34541488	0.27
			31215166	0.263			35873155	0.006
			31215340	0.022			41118036	0.739
			31233972	0.028			41128183	0.722
			31234209	0.028			41128201	0.273
			31623057	0.04			42821757	0.04
			31623319	0.437			43035995	0.117
			31647746	0.165			43651650	0.006
			31647747	0.247			44333701	0.185
			31650455	0.159			46205539	0.528
			31690004	0.052			46568106	0.519
			31696363	0.619			47552976	0.129
			31954991	0.14			47732088	0.713
			32253971	0.034			47760576	0.287
			32300085	0.438			52158312	0.239
			32914554	0.317			52158745	0.539
			32920836	0.165			53628877	0.006
			32920894	0.455			55552059	0.576
			33017313	0.028			71070361	0.094
			33029752	0.159			74162183	0.567
			33044351	0.196			74228105	0.079
			33268403	0.612			78230101	0.922
			36753674	0.456			78230699	0.922
			37063042	0.533			82520095	0.264
			37080810	0.113			83959850	0.006
			38797853	0.011			88356732	0.472
			39399085	0.699			89984145	0.056
			41115813	0.261			91353801	0.376
			41128900	0.226			94186745	0.461
			43502456	0.303			97392042	0.006
			44202283	0.247			97478333	0.08
			44389862	0.233			99979972	0.744
			46205588	0.524			105692204	0.831
			52061056	0.174			108252624	0.867
			52392680	0.949			109810755	0.258
			52392973	0.183			116489504	0.994
			55552693	0.416			116554049	0.006
			63054958	0.178			116956178	0.062
			74161140	0.163			116956232	0.551
			74461607	0.32			117044035	0.303
			80770804	0.64			117909831	0.283
			80770952	0.644			123358607	0.157
			80872864	0.19			132932878	0.443
			84476512	0.73			132953412	0.222
			84994249	0.64			136613158	0.09
			88356029	0.349			137184639	0.517
			91353850	0.006			137582923	0.022
			91354335	0.972			149762539	0.067
			97076276	0.017			149848245	0.258
			97478544	0.657			150505069	0.157
			99949172	0.736			155677329	0.831
			105415286	0.591			165643156	0.287
			108252494	0.1			166676981	0.388
			110118717	0.287			170705298	0.725
			111385490	0.618
			116707467	0.367
			117044087	0.281
			117910231	0.601
			119080735	0.7
			119298678	0.68
			119713557	0.669
			121697889	0.798
			123141681	0.006
			124000192	0.107
			126702847	0.994
			127628779	0.635
			130728137	0.343
			131935252	0.663
			132876211	0.303
			133161471	0.955
			133161544	0.129
			134251530	0.523
			134416099	0.783
			135313021	0.32
			142509959	0.144
			142509964	0.153
			144654362	0.306
			166676169	0.388
			167196540	0.167
			170457080	0.669

## Sheet: CHR 18
		BLUE: Foreground	895125	0.876		PINK: Background	2562056	0.767
			2561846	0.764			5882517	0.665
			9875569	0.917			10688411	0.517
			12648191	0.233			10688648	0.506
			13906294	0.228			12243419	0.809
			16945764	0.106			26877227	0.101
			27210320	0.916			30326306	0.624
			31124208	0.612			31901668	0.635
			31963004	0.826			41458254	0.932
			31963215	0.178			41938655	0.551
			31963546	0.328			43712076	0.848
			31963662	0.174			45341689	0.146
			31963760	0.169			45595049	0.653
			41457783	0.921			46062478	0.768
			42751722	0.685			50135378	0.685
			46658782	0.426			55515808	0.326
			52468910	0.989			57307995	0.006
			52469170	0.955			59406159	0.253
			52469452	0.989			73090385	0.253
			52469840	0.011
			52469897	0.989
			53440074	0.017
			54448090	0.146
			55516506	0.551
			58005094	0.152
			58005233	0.809
			58142858	0.157
			59788205	0.775
			69966043	0.144
			69966102	0.129
			69966400	0.837
			69966466	0.156
			70351856	0.893
			75540520	0.5

## Sheet: CHR 9
		BLUE: Foreground	4669304	0.41		PINK: Background	261132	0.361
			14684211	0.361			460086	0.315
			14713637	0.983			2525036	0.017
			14901241	0.466			2834360	0.039
			19777182	0.764			4479494	0.933
			21068815	0.191			4480018	0.033
			21068952	0.32			4480134	0.967
			27519863	0.669			5428204	0.136
			34580463	0.045			9009381	0.067
			34979545	0.067			19285941	0.058
			35093565	0.056			28661250	0.144
			35648163	0.343			32373708	0.267
			35665961	0.082			32543171	0.096
			35666607	0.129			33015113	0.202
			35739845	0.625			33207406	0.831
			35805613	0.233			34039779	0.224
			35895761	0.239			34627991	0.275
			36158940	0.478			35738806	0.778
			37742888	0.047			36159187	0.078
			37742947	0.438			36180198	0.169
			38382402	0.753			36391868	0.59
			70955901	0.722			37024669	0.205
			70955911	0.722			37743709	0.006
			76301979	0.961			70955437	0.079
			78516500	0.039			73953235	0.944
			78981781	0.107			85513094	0.073
			79453669	0.579			91115908	0.034
			83494805	0.888			91408858	0.028
			85762395	0.219			98104704	0.264
			91122954	0.64			99436157	0.921
			91409080	0.674			99922308	0.047
			91409741	0.935			100745731	0.006
			93753189	0.189			103200159	0.112
			93917657	0.652			106549225	0.469
			93918337	0.222			110659542	0.845
			95758411	0.826			110663762	0.172
			98105190	0.339			112010104	0.163
			99040343	0.1			112010283	0.176
			101901269	0.073			112470630	0.011
			102380130	0.917			113433218	0.433
			103335585	0.163			114196606	0.318
			103335590	0.18			116197155	0.178
			106549138	0.036			122697323	0.309
			110736875	0.534			123004722	0.817
			113433056	0.433			126218087	0.165
			113433067	0.433			126992567	0.522
			116732994	0.045			129198801	0.006
			121171959	0.983			129253329	0.567
			121172005	0.006			129741374	0.59
			123070000	0.596			130005056	0.017
			126663253	0.051			130172579	0.012
			127002318	0.8			134895878	0.225
			127509504	0.148			135233145	0.017
			127548068	0.157			137731671	0.68
			129044295	0.101			138237466	0.528
			129199154	0.107			139100238	0.609
			129517589	0.275
			129741473	0.101
			129741533	0.079
			130459243	0.169
			130683725	0.933
			130883104	0.118
			131555551	0.854
			131974002	0.848
			132443927	0.191
			134272757	0.478
			134810429	0.079
			134810552	0.079
			135029219	0.557
			135029354	0.424
			136911503	0.124
			136911587	0.146
			136912318	0.067
			137531120	0.161
			138413080	0.73
			139632376	0.91

## Sheet: CHR 7
		BLUE: Foreground	7240084	0.453		PINK: Background	1092419	0.489
			7240372	0.994			2850959	0.326
			8268809	0.5			7578374	0.611
			12377336	0.156			8269175	0.086
			12576513	0.628			14848342	0.222
			19715260	0.244			16811206	0.463
			21548837	0.072			19715408	0.556
			23305299	0.75			23020530	0.417
			23305416	0.006			27745975	0.12
			23716357	0.197			30511788	0.375
			27102833	0.292			30776789	0.036
			27191488	0.079			32496723	0.174
			30033873	0.894			32500728	0.197
			30289807	0.006			34663665	0.8
			30511272	0.636			35701718	0.287
			31347668	0.2			36158632	0.697
			31692502	0.029			38915949	0.453
			35020363	0.778			44196493	0.767
			36730648	0.489			44581711	0.017
			36730667	0.011			55986160	0.472
			37455929	0.236			72734929	0.32
			37854699	0.253			76589293	0.011
			37923633	0.572			86110719	0.843
			44128334	0.797			87343366	0.847
			44128861	0.173			89678811	0.596
			44128880	0.228			91995738	0.061
			47985882	0.149			95064645	0.764
			48041482	0.414			97339971	0.506
			50103459	0.916			99594439	0.632
			56151986	0.506			103635823	0.476
			65217273	0.256			116750798	0.635
			75207039	0.23			117610564	0.888
			75207149	0.228			117610701	0.017
			76589857	0.483			129770971	0.111
			89711660	0.358			129771866	0.365
			89711703	0.529			129807152	0.378
			91995822	0.933			133981299	0.663
			94864263	0.801			134321570	0.126
			95063917	0.25			138134121	0.506
			98874856	0.006			140897513	0.944
			99864228	0.18			142370462	0.007
			100648590	0.8			148057605	0.267
			100675457	0.657			149842126	0.011
			105390330	0.736			156623883	0.376
			105390594	0.028
			105390619	0.764
			116855592	0.011
			120285602	0.691
			120285844	0.316
			127015005	0.691
			127020515	0.083
			128482515	0.445
			129478545	0.747
			129771213	0.522
			129771810	0.483
			130023348	0.222
			135063979	0.466
			138014436	0.203
			138134110	0.324
			139752973	0.77
			140019048	0.916
			141188463	0.776
			142723293	0.966
			148057204	0.729
			149842379	0.961
			150386106	0.708
			150560409	0.603
			151284419	0.652
			156126004	0.395
			156843995	0.742

## Sheet: CHR 14
		BLUE: Foreground	20573391	0.242		PINK: Background	19969322	0.078
			20975543	0.089			20527785	0.208
			22305295	0.614			20573635	0.111
			22659189	0.5			20607907	0.398
			22659426	0.483			20694768	0.467
			23066612	0.199			22305537	0.611
			23669712	0.421			22521968	0.236
			23670230	0.583			22658703	0.465
			23743815	0.906			23609368	0.034
			23802314	0.067			23734847	0.201
			23879797	0.089			23879635	0.683
			28304359	0.129			24048275	0.233
			34169348	0.585			24174200	0.506
			34660925	0.552			30747072	0.256
			34661477	0.556			34079384	0.697
			36121874	0.23			34944605	0.156
			36122383	0.202			38642569	0.339
			38642814	0.022			38652639	0.182
			44674211	0.893			51382772	0.994
			49429239	0.972			51383048	0.978
			54045382	0.264			54949030	0.472
			54728174	0.178			55654252	0.58
			54728738	0.028			57963544	0.994
			54949008	0.283			59021031	0.152
			57963219	0.994			72430774	0.444
			57963566	0.994			76361846	0.278
			59408099	0.406			76717355	0.326
			59408275	0.927			80477918	0.017
			59456066	0.094			80478057	0.466
			60518263	0.208			90649699	0.096
			61532233	0.142			91484133	0.039
			64417336	0.478			93493675	0.971
			66948790	0.376			93494408	0.017
			69993825	0.533			99912652	0.567
			72995648	0.107			101899928	0.449
			73296999	0.122			104116569	0.256
			73388300	0.083			104462179	0.258
			73388398	0.399
			73422773	0.528
			73553321	0.6
			73620366	0.25
			74539308	0.837
			75197558	0.58
			75687782	0.572
			77243745	0.05
			80491176	0.292
			87863867	0.006
			88086770	0.018
			89491246	0.307
			91657557	0.876
			91657972	0.862
			92329755	0.227
			93454037	0.361
			93618250	0.617
			93989471	0.652
			94012766	0.18
			95250438	0.766
			95250448	0.061
			96038357	0.854
			99601237	0.539
			99911648	0.076
			99911812	0.742
			99912390	0.804
			102405703	0.994
			103099131	0.131
			103099572	0.294
			104506694	0.422

## Sheet: CHR 19
		BLUE: Foreground	446722	0.354		PINK: Background	585095	0.694
			702060	0.011			701583	0.121
			991773	0.933			1441703	0.556
			1299184	0.393			2426411	0.055
			1544540	0.955			3129372	0.067
			3451641	0.315			4818701	0.118
			3451714	0.981			6344620	0.398
			3831577	0.169			6690278	0.236
			3958080	0.006			7605292	0.772
			4293730	0.585			7607748	0.253
			4465135	0.033			8279778	0.854
			4675732	0.478			9111370	0.946
			5406386	0.994			10077604	0.36
			6689233	0.174			10842352	0.406
			7915016	0.006			11326316	0.736
			8023608	0.1			12582600	0.022
			8292662	0.067			12859205	0.648
			8416413	0.006			13877774	0.692
			10541241	0.107			18311713	0.006
			10808522	0.406			19006193	0.106
			10932148	0.281			40297779	0.844
			11127693	0.278			40325076	0.742
			12778100	0.096			40795357	0.213
			12940954	0.193			41037791	0.837
			13745800	0.354			41177315	0.218
			13746024	0.218			41297634	0.225
			13849040	0.305			42650315	0.733
			14945306	0.717			42838613	0.09
			17526867	0.994			42838958	0.045
			18124703	0.809			44215181	0.006
			18176629	0.089			44378961	0.017
			18247063	0.154			44594928	0.143
			18608605	0.061			45017480	0.846
			19111145	0.674			46390833	0.089
			37902486	0.2			46596005	0.443
			38052643	0.517			47439120	0.112
			38154898	0.706			51059105	0.761
			40325343	0.253			51541646	0.056
			40632127	0.722			51667007	0.861
			41085026	0.888			51691531	0.157
			41177216	0.006			51830337	0.096
			43486590	0.15			53664351	0.478
			44060838	0.174			53868842	0.217
			44061354	0.199			54128057	0.079
			44113544	0.994			54308888	0.208
			46552136	0.494			54309050	0.794
			48816208	0.265			55710673	0.124
			49696485	0.637			57384640	0.961
			49696663	0.337			59311003	0.225
			50662935	0.343			59369001	0.2
			50780764	0.58			60579478	0.789
			51666164	0.14			60665676	0.011
			53364812	0.068			60815861	0.017
			53663967	0.478			61378765	0.656
			53942350	0.188			63301919	0.101
			54280232	0.022			63346007	0.899
			54350687	0.742
			54558731	0.461
			54648102	0.594
			54885243	0.006
			55578899	0.206
			55579280	0.006
			56026702	0.256
			56583921	0.652
			56919728	0.006
			56947008	0.056
			56947801	0.129
			59332292	0.778
			59368813	0.217
			59368979	0.023
			59385777	0.156
			59396532	0.062
			60109281	0.042
			60412720	0.09
			60802848	0.7
			61378613	0.382
			61681003	0.175

## Sheet: CHR 2
		BLUE: Foreground	656844	0.083		PINK: Background	37208	0.253
			1396206	0.18			1395442	0.385
			11190408	0.072			1395646	0.32
			16711397	0.619			9614015	0.983
			19965313	0.422			11727939	0.388
			20115495	0.272			17799261	0.928
			20115833	0.348			20715089	0.438
			25419411	0.174			29151262	0.35
			26059759	0.933			41931859	0.428
			26321170	0.03			42873312	0.024
			26321869	0.865			43853999	0.882
			27457783	0.882			43919751	0.017
			27740538	0.051			44077203	0.921
			30222380	0.216			47651937	0.129
			30884102	0.222			48837293	0.386
			41931292	0.733			53867031	0.65
			43919678	0.189			53935909	0.146
			46559972	0.41			55774620	0.118
			47483402	0.191			58322264	0.09
			48521248	0.135			68445444	0.747
			54411080	0.848			68952977	0.758
			55313521	0.107			70849796	0.006
			56264661	0.112			70917233	0.089
			63922292	0.106			71148221	0.224
			68401154	0.049			71211218	0.303
			68445819	0.236			73818139	0.722
			69093099	0.069			74424162	0.517
			70167471	0.14			74473106	0.488
			70375070	0.117			75726725	0.685
			71534140	0.591			84540440	0.011
			74423785	0.494			85676329	0.006
			75650458	0.233			86276456	0.15
			86276665	0.854			86276530	0.85
			88148061	0.107			86276542	0.85
			88604809	0.206			86872058	0.949
			88605219	0.206			88209686	0.775
			96335136	0.682			95194379	0.567
			99320066	0.348			99164030	0.747
			100453231	0.606			102169654	0.006
			102456110	0.417			102455510	0.522
			105020528	0.661			105223849	0.051
			106870801	0.961			112773372	0.758
			107969351	0.028			113647338	0.589
			108271480	0.789			118561741	0.365
			113310858	0.539			120486836	0.017
			118562289	0.106			120818949	0.146
			119322727	0.096			135392357	0.146
			131229320	0.522			136006035	0.033
			142605624	0.669			151826725	0.074
			152664051	0.006			171380641	0.208
			152899356	0.994			171726152	0.601
			153282338	0.138			172252159	0.792
			158666507	0.133			172675548	0.129
			159359980	0.14			173308065	0.438
			160363949	0.256			174539269	0.601
			160765855	0.022			175060304	0.337
			165520965	0.261			178681364	0.247
			165769457	0.972			203207757	0.174
			166638709	0.967			204439764	0.1
			169367190	0.011			204509090	0.594
			169928127	0.567			208703343	0.444
			170148560	0.264			208703354	0.278
			172087064	0.093			218698831	0.315
			176736797	0.022			219559156	0.006
			182558271	0.024			219792713	0.106
			189753010	0.656			223229222	0.567
			190014031	0.611			225616301	0.188
			191008241	0.006			234623231	0.112
			191817803	0.612			241904051	0.655
			202354206	0.567
			203900446	0.421
			207338040	0.747
			208703094	0.466
			208719136	0.169
			208838359	0.006
			216985172	0.854
			217071294	0.169
			219141197	0.764
			219141517	0.764
			219141633	0.86
			219141841	0.094
			219245210	0.851
			219614958	0.567
			220007785	0.771
			223229149	0.567
			224975125	0.006
			227408162	0.653
			230287619	0.891
			233205341	0.167
			238672942	0.831
			238673281	0.024
			241174364	0.084
			241215102	0.661
			241617652	0.32

[truncated: 2 more sheets: CHR 17, CHR 8]
